# Supplementary material for: The endocannabinoid anandamide has an anti-inflammatory effect on CCL2 expression in vascular smooth muscle cells
Source: PubMed Central journal article supplement (PMC7176595; doi:10.1007/s00395-020-0793-3), 2020-04-22
Supplement: 395_2020_793_MOESM1_ESM.pdf [file 395_2020_793_MOESM1_ESM.pdf]

Supplemental Table 5 z-score of regulated genes shown in the heatmap

| Gene          | ETOH_1       | ETOH_2       | ETOH_3       | AEA_1        | AEA_2        | AEA_3        | ETOH.IIb_1   | ETOH.IIb_2   | ETOH.IIb_3   | AEA.IIb_1    | AEA.IIb_2   | AEA.IIb_3   |
|---------------|--------------|--------------|--------------|--------------|--------------|--------------|--------------|--------------|--------------|--------------|-------------|-------------|
| NFKBID        | -0.93226995  | -1.256711756 | -1.265158542 | -0.603763988 | -1.063434485 | -0.166082359 | 0.886220946  | 0.500753739  | 0.322651032  | 1.29885603   | 1.183281335 | 1.095676426 |
| BCL2A1        | -0.95176363  | -0.815487602 | -2.065369012 | -0.202913034 | -0.452724999 | -0.351554333 | 0.492224453  | 0.663111156  | 0.204612777  | 1.306787851  | 1.039277342 | 1.132899032 |
| INHBA         | -1.88244944  | -0.872961997 | -1.573129086 | 0.008189493  | 0.078159144  | 0.296106512  | 0.409267123  | 0.062045797  | 0.062045797  | 1.154168236  | 1.274544032 | 0.997737544 |
| CXCL2         | -1.519980804 | -1.52784013  | -1.239295447 | 0.157530878  | 0.032829559  | 0.679354562  | -0.436054219 | 0.352736525  | 0.061574016  | 1.242164214  | 1.267903105 | 0.92907771  |
| NOCT          | -1.628042039 | -1.179631157 | -1.065670187 | -0.718219006 | -0.571952197 | 0.326848042  | 0.170937829  | 0.626360723  | 0.502852232  | 1.276149974  | 1.216512604 | 1.043851813 |
| CLUHP3        | -1.772890808 | -1.243492994 | -0.93901898  | -0.343876509 | -0.127096415 | 0.846143707  | -0.342869914 | -0.114581157 | 0.488918858  | 1.246907913  | 1.199332124 | 1.102521317 |
| LINC00936     | -1.291413172 | -1.293899968 | -1.032568235 | -0.315385396 | -0.486001565 | 0.827162599  | -0.25798627  | -0.419836908 | 0.353569484  | 1.232512024  | 1.118160565 | 1.483499199 |
| LIF           | -1.851372168 | -1.074793209 | -1.533485209 | -0.225127899 | 0.039162556  | 0.561516111  | 0.044109168  | 0.785920171  | 0.30041869   | 0.815060511  | 1.205621829 | 0.932969449 |
| RIPK2         | -1.431039517 | -0.96018118  | -1.904473623 | -0.172939221 | -0.124827568 | 0.088848568  | 0.217510462  | 0.483449922  | 0.42513696   | 0.892900989  | 1.21097646  | 1.214637748 |
| SLC26A8       | -1.243014485 | -0.894107391 | -1.163589574 | -0.956263987 | -0.825522138 | 0.202971445  | 0.425353318  | 0.059254018  | 0.599045968  | 0.825346598  | 1.367113525 | 1.603412702 |
| CXCL3         | -1.595084753 | -1.52983549  | -1.486411307 | -0.00054693  | 0.024883455  | 0.60519468   | 0.004402296  | 0.482468339  | 0.439811718  | 1.04827847   | 0.993679779 | 1.013159743 |
| SLC43A3       | -1.004568695 | -1.007674936 | -1.314457153 | -0.206179415 | -0.702633841 | 0.868382435  | -0.516547705 | -0.289887816 | 0.382570287  | 0.913912166  | 0.945549955 | 1.931534718 |
| NFKB2         | -1.721086117 | -1.21506925  | -1.086578652 | -0.655686727 | -0.445278224 | 0.533966094  | 0.06773342   | 0.591684571  | 0.56384137   | 1.018548878  | 1.150658279 | 1.197266357 |
| PNRC1         | -0.95668649  | -1.286170532 | -0.506091722 | -0.493117717 | -1.116627279 | 0.977192166  | 0.047054157  | -0.71089841  | 0.394597437  | 1.483165373  | 0.575276855 | 1.592306483 |
| BCL6          | -1.173145606 | -1.712990575 | -1.188252158 | 0.353806707  | -0.542002289 | 0.807672702  | -0.052942111 | -0.125851045 | 0.217768661  | 1.354935004  | 0.730174082 | 1.330827527 |
| PPP1R15B      | -1.319873996 | -1.094035532 | -1.345174128 | -0.03416801  | -0.316098571 | 0.35766464   | -0.165120509 | -0.393111132 | 0.270479191  | 1.713982193  | 0.91178158  | 1.413674275 |
| NUAK2         | -1.520308832 | -1.592347068 | -0.927411926 | 0.400750874  | -0.523208024 | 0.840284119  | -0.354320089 | -0.113325497 | 0.46228264   | 1.378801558  | 0.959002692 | 0.989799554 |
| TNFAIP3       | -1.448462878 | -1.324443518 | -1.16295733  | -0.374293077 | -0.673841325 | 0.618301599  | -0.10540813  | 0.365493102  | 0.468320514  | 1.377487922  | 1.084999622 | 1.174803499 |
| PDE4B         | -0.871329107 | -1.350871279 | -1.735969767 | 0.02878379   | -0.933507303 | 0.149415728  | 0.27545455   | 0.436856815  | 0.639088587  | 1.327983836  | 1.02904726  | 1.00504689  |
| PMAP1         | -1.386241777 | -1.842695955 | -1.024227259 | 0.500367747  | -0.114998173 | 0.322133892  | -0.293691308 | -0.025312929 | 0.520668922  | 1.408987124  | 0.807764918 | 1.127244798 |
| GBF2          | -0.968196178 | -1.150420578 | -1.017109596 | -1.04592969  | -0.95048083  | 0.049370086  | 0.19698229   | 0.298218572  | 0.820117177  | 0.941972716  | 1.521224705 | 1.305135387 |
| SELE          | -1.06467124  | -1.064648386 | -1.064233639 | -0.975119336 | -1.064229099 | 0.024140074  | 0.128828001  | 0.650091802  | 0.779522843  | 1.112368465  | 1.34805444  | 1.1898377   |
| CD70          | -1.023966528 | -1.024658758 | -1.023075937 | -0.873611768 | -0.873611768 | -0.252899347 | 0.135239468  | 0.638367121  | 0.638367121  | 1.524702038  | 1.261470848 | 1.261470848 |
| RP11-58K22.4  | -1.143333762 | -0.992075126 | -0.625824183 | -0.735144045 | -1.142330121 | 0.872167876  | -0.132937165 | -0.529007203 | 0.764187827  | 0.84680242   | 1.14572735  | 1.672766133 |
| IRF1          | -1.119083066 | -1.369171862 | -1.109431808 | -0.932398653 | -0.936218005 | 0.308315262  | 0.448195538  | 0.693382081  | 0.815690437  | 0.926275967  | 1.192363804 | 1.082980264 |
| CCLD2         | -1.31881675  | -0.91654245  | -1.153248297 | -1.096903774 | -0.866017507 | 0.238310967  | 0.486397487  | 0.390836301  | 0.729517946  | 0.988210497  | 1.163053054 | 1.345314564 |
| CD83          | -1.138074305 | -1.101630898 | -1.256646441 | -0.856446464 | -0.121257352 | -0.101963963 | 0.786742545  | 0.67489624   | 0.819387593  | 1.146666225  | 1.051379932 | 0.988281257 |
| CTD-236C16.2  | -0.76814897  | -1.605963805 | -0.504392851 | 0.012898341  | -1.28567068  | 0.489127643  | -0.63003633  | -0.63003633  | 0.688580924  | 0.898094498  | 1.651628428 | 1.651628428 |
| TNFSF9        | -1.11864011  | -1.097233049 | -1.295158304 | -0.623597995 | -0.909132873 | -0.287715437 | 0.409641371  | 0.367719317  | 0.926009516  | 1.310654509  | 0.780785009 | 1.232719414 |
| MAFF          | -2.201929836 | -0.531482508 | -1.526635948 | 0.15537164   | 0.086963074  | 0.67903254   | -0.095853942 | 0.112780004  | 0.459787586  | 1.169695891  | 0.710051198 | 0.967711936 |
| CD74          | -1.499608226 | -1.330024084 | -1.533256324 | 0.124396043  | -0.317946686 | 0.765505817  | -0.249155252 | 0.392923145  | 0.577011313  | 0.937785631  | 0.739221562 | 1.403404359 |
| C8orf4        | -1.247986942 | -1.614128555 | -0.974216952 | 0.025894051  | -0.820948758 | 0.956321177  | -0.143303719 | 0.009630543  | 0.717109106  | 0.962465543  | 0.524926324 | 1.59523818  |
| CSF3          | -1.30131128  | -1.172789768 | -1.2109888   | -0.69013915  | -0.797120263 | 0.959687796  | 0.117070369  | 0.311174354  | 0.582919588  | 1.047368854  | 0.545787029 | 1.60834927  |
| IL23A         | -0.896238289 | -1.063311293 | -0.859804363 | -0.751487423 | -0.972504467 | 0.796516517  | -0.100365368 | -0.249897749 | 0.56100677   | 1.219395381  | 0.257172923 | 2.095172923 |
| C11orf96      | -1.441538082 | -1.194058698 | -1.21104935  | 0.035033623  | -0.194400113 | 1.285752709  | -0.08449001  | -0.505183352 | 0.156713457  | 0.841580441  | 0.576804189 | 1.734794166 |
| LINC011       | -1.292944144 | -1.321665077 | -1.176525817 | 0.337506209  | 0.298406693  | -0.341606911 | -0.776576557 | -0.060820238 | 0.78211938   | 0.677770322  | 1.622740003 | 1.622740003 |
| FTSP3         | -0.916213915 | -0.916796687 | -0.915258434 | -0.374655366 | -0.915211283 | 1.152186887  | -0.6130492   | -0.01454921  | 0.131346001  | 0.368564253  | 0.559104466 | 2.085228099 |
| STK40         | -1.672684622 | -1.385468881 | -1.194984958 | 0.113787824  | -0.414974159 | 0.389679333  | 0.325517789  | 0.293971335  | 0.102838551  | 1.209007523  | 1.008082136 | 0.68283196  |
| DNAJB4        | -1.613938703 | -1.259995139 | -0.942891339 | 0.269166952  | 0.210576842  | 0.145824209  | -0.280846609 | -0.38467732  | 0.020857236  | 1.781157023  | 1.394585969 | 0.660178879 |
| NFKBIA        | -1.442817166 | -1.392773894 | -1.026023491 | -0.175826953 | -0.169162676 | 0.403873313  | -0.344967665 | 0.058017179  | 0.143857056  | 1.597401678  | 1.458882048 | 0.819911171 |
| BAMBI         | -1.436863667 | -1.083913968 | -1.121510993 | -0.011589151 | -0.132325161 | -0.528245051 | -0.259908324 | 0.426771231  | 0.317956885  | 1.698128023  | 1.657362897 | 0.474137125 |
| RP11-356I2.4  | -1.266433422 | -1.266433422 | -1.283209278 | -0.704400016 | -0.36939267  | 0.412569511  | 0.146672285  | 0.152805989  | 0.362467213  | 1.484273182  | 1.451659796 | 0.898517052 |
| MIR155HG      | -1.256219476 | -0.881130553 | -1.126596127 | -0.94035376  | -0.720860921 | -0.046273961 | -0.038829943 | 0.735746472  | 0.439885285  | 1.196531478  | 1.720579589 | 0.917521286 |
| GBP5          | -0.236445557 | -1.506990529 | -1.299318529 | -0.190363542 | -0.889173469 | -0.530682003 | 0.520528696  | 0.138108058  | 0.396218503  | 1.3175140832 | 1.671540832 | 0.938997801 |
| RP11-317P15.4 | -0.866019676 | -1.252730287 | -0.699861515 | -0.701926874 | -0.286661758 | -0.70160934  | 0.228441462  | -0.417061705 | 0.230850892  | 1.150960688  | 1.764924577 | 1.550692757 |
| AC116366.5    | -1.096973034 | -0.891713606 | -1.094166778 | -0.703935779 | -0.308427186 | 0.121451313  | -0.535663028 | -0.245149491 | 0.471488173  | 1.282899289  | 1.991600016 | 1.00858978  |
| AP000223.42   | -1.303367037 | -1.117370031 | -0.826590831 | -0.870367295 | -0.515181262 | 0.449609934  | -0.516704848 | 0.252148888  | 0.880304486  | 0.461034593  | 1.577679398 | 1.528804418 |
| RP11-981P6.1  | -1.166420105 | -1.076684501 | -0.865512862 | -0.876439313 | -0.284450161 | 0.910669671  | -0.799357207 | 0.08734973   | 0.697143665  | 0.404264548  | 1.458887502 | 1.628232228 |
| USP4          | -1.06417136  | -1.010756107 | -1.170020289 | -0.907075783 | -0.371522752 | 0.64038103   | -0.506112791 | 0.235325214  | 0.704653979  | 0.243993914  | 1.827863283 | 1.377477747 |
| CD40          | -0.580384263 | -1.240053491 | -0.842109224 | -0.821092224 | -0.89576702  | -0.352805705 | 0.0041108    | -0.27286098  | 0.867721562  | 1.767621562  | 1.555089939 | 1.555089939 |
| RN75L751P     | -1.28187406  | -0.919954805 | -0.916622144 | -0.373216013 | -0.370741597 | 0.276835388  | -0.763093521 | 0.196996427  | 0.353499306  | 0.278188248  | 2.146178953 | 1.37380184  |
| IL7           | -0.470476256 | -1.32567653  | -1.213914207 | -0.601875419 | -0.601875419 | 0.123371557  | -0.289998081 | 0.592933772  | 0.298732837  | 0.674528437  | 2.298732837 | 0.674528437 |
| RP6-99M13.3   | -1.994486062 | -1.152161124 | -1.100068192 | 0.337365711  | 0.676866066  | 0.783351843  | -0.385371767 | -0.122431287 | 0.185860991  | 0.358325245  | 1.382035247 | 1.030686165 |
| CCD4A         | -1.117269759 | -1.076522953 | -1.116356335 | -0.755915073 | -1.162426176 | 1.142416376  | -0.86537034  | 0.307391751  | 0.193254801  | -0.06232113  | 1.392542891 | 1.794320177 |
| MIR222HG      | -1.789787681 | -1.197450536 | -0.987548118 | 0.300138766  | 0.338230351  | 0.99401122   | -0.733224419 | -0.31327662  | 0.508257476  | 0.393504961  | 1.081954476 | 1.405440875 |
| OR1L-AS1      | -1.289925593 | -0.700084566 | -0.821619716 | -1.068104896 | -0.821500524 | 0.220577646  | 0.018247214  | -0.040314189 | 0.291138074  | 0.861318213  | 1.719191455 | 1.60107668  |
| E1F1B         | -1.180499502 | -1.007302577 | -1.366921261 | -0.779952715 | -0.73817696  | 0.170578222  | 0.248939653  | 0.550251776  | 0.317485927  | 0.823856209  | 1.553872961 | 1.407940266 |
| AKAP2         | -1.739915408 | -0.669847617 | -1.265133405 | -0.443599979 | 0.292981841  | 0.732086535  | -0.189981803 | 0.093854511  | 0.902931575  | 1.441191244  | 0.902931575 | 1.37140107  |
| RP11-248I18.2 | -1.122712764 | -1.379943968 | -0.890592208 | -0.688935104 | -0.432002176 | 1.053275532  | -0.606185259 | -0.128377874 | -0.219210019 | 0.638366881  | 1.762643819 | 1.150586787 |
| GORAB         | -1.565510475 | -1.364814232 |              |              |              |              |              |              |              |              |             |             |
