# Supplementary material for: The endocannabinoid anandamide has an anti-inflammatory effect on CCL2 expression in vascular smooth muscle cells
Source: Springer Nature journal article supplement (doi:10.1007/s00395-020-0793-3), 2020-04-22
Supplement: MOESM2 [file 395_2020_793_MOESM2_ESM.pdf]

# The Endocannabinoid Anandamide has an anti-inflammatory effect on CCL2 expression in vascular smooth muscle cells

Beatrice Pflüger-Müller<sup>1,2</sup>, James A. Oo<sup>1,2</sup>, Jan Heering<sup>4</sup>, Timothy Warwick<sup>1,2</sup>, Ewgenij Proschak<sup>6</sup>, Stefan Günther<sup>3</sup>, Mario Looso<sup>3</sup>, Flávia Rezende<sup>1,2</sup>, Christian Fork<sup>1,2</sup>, Gerd Geisslinger<sup>4,5</sup>, Dominique Thomas<sup>5</sup>, Robert Gurke<sup>4,5</sup>, Dieter Steinhilber<sup>4,6</sup>, Marcel Schulz<sup>7</sup>, Matthias S. Leisegang<sup>1,2</sup> and Ralf P. Brandes<sup>1,2\*</sup>

<sup>1</sup> Institute for Cardiovascular Physiology, Goethe University, 60590 Frankfurt am Main, Germany,

<sup>2</sup> German Center for Cardiovascular Research (DZHK), Partner site Rhein Main, Frankfurt am Main, Germany,

<sup>3</sup> Max-Planck-Institute for Heart- and Lung Research (MPI-HLR), 61231 Bad Nauheim, Germany,

<sup>4</sup> Fraunhofer Institute for Molecular Biology and Applied Ecology IME, Branch for Translational Medicine and Pharmacology TMP, 60438 Frankfurt am Main, Germany,

<sup>5</sup> Pharmazentrum Frankfurt/ ZAFES, Institute of Clinical Pharmacology, Faculty of Medicine Goethe-University, 60590 Frankfurt am Main, Germany,

<sup>6</sup> Institute of Pharmaceutical Chemistry, Goethe-University, 60438 Frankfurt am Main, Germany,

<sup>7</sup> Vascular Research Centre, Goethe-University, 60596 Frankfurt am Main, Germany

**Short running title:** Anandamide and vascular anti-inflammatory actions

## Supplemental Tables

**Table 1 siRNAs used in this study**

| <b>Gene</b>  | <b>Cat. No.</b>   | <b>Company</b>              |
|--------------|-------------------|-----------------------------|
| <b>NCoR1</b> | #HSS114352        | Stealth siRNA, Thermofisher |
| <b>Sin3A</b> | #J-012990-05-0002 | Dharmacon                   |
| <b>LCoR1</b> | #J-015742-17-0002 | Dharmacon                   |
| <b>RCOR1</b> | #J-014076-06-0002 | Dharmacon                   |
| <b>SMRT</b>  | #HSS114356        | Stealth siRNA, Thermofisher |

| <b>Gene</b>   | <b>Cat. No.</b> | <b>Company</b>              |
|---------------|-----------------|-----------------------------|
| <b>HDAC4</b>  | #HSS114673      | Stealth siRNA, Thermofisher |
| <b>HDAC5</b>  | #HSS173323      | Stealth siRNA, Thermofisher |
| <b>HDAC7</b>  | #HSS147499      | Stealth siRNA, Thermofisher |
| <b>HDAC9</b>  | #HSS114607      | Stealth siRNA, Thermofisher |
| <b>siScr1</b> | #12935-200      | Stealth siRNA, Thermofisher |
| <b>siScr2</b> | #12935-300      | Stealth siRNA, Thermofisher |
| <b>siScr3</b> | #12935-400      | Stealth siRNA, Thermofisher |

**Table 2 Primer sequences for RT-qPCR**

| <b>Gene</b>                             | <b>Primer</b> | <b>Sequence (5'-3')</b>           |
|-----------------------------------------|---------------|-----------------------------------|
| <b>Human CCL2</b>                       | forward       | CAA GCA GAA GTG GGT TCA GGA T     |
|                                         | reverse       | TTA GCT GCA GAT TCT TGG GTT GT    |
| <b>Murine CCL2</b>                      | forward       | CCA CTC ACC TGC TGC TAC TCA TTC   |
|                                         | reverse       | GTC AC TCC TAC AGA AGT GCT TGA GG |
| <b>Human NCoR1</b>                      | forward       | GAT CAC CAG GTC CAT GAC AAA C     |
|                                         | reverse       | TTC GTT CCC ACC ATT TTA GCA A     |
| <b>Human GAPDH</b>                      | forward       | TGC ACC ACC AAC TGC TTA GC        |
|                                         | reverse       | GGC ATG GAC TGT GGT CAT GAG       |
| <b>Murine <math>\alpha</math>-Actin</b> | forward       | ACA GAG GCA CCA CTG AAC CCT AAG   |
|                                         | reverse       | ACA ATC TCA CGC TCG GCA GTA GTC   |
| <b>human HDAC4</b>                      | forward       | GAA ACG AGC TTG ATC CTC TCC CAG   |
|                                         | reverse       | GCT TCA CGC CCA CGG ACA GCG AG    |

| <b>Gene</b>        | <b>Primer</b> | <b>Sequence (5'-3')</b>         |
|--------------------|---------------|---------------------------------|
| <b>human HDAC5</b> | forward       | TCT GAG GCT TGT GTC TCG GCT CTG |
|                    | reverse       | AGG CTC CTG CTC CAT GGG CTC CTC |
| <b>human HDAC7</b> | forward       | TCT TCT GGG TAA CAG GGT GGA TC  |
|                    | reverse       | ACC AGC TGC TCC GAG GGC CTA TC  |
| <b>human HDAC9</b> | forward       | TCA GGA CCA TCG TGA AGC CTG TG  |
|                    | reverse       | TGC AAG TGG CTC CAG CTC ATT TCC |

**Table 3 Primer sequences for ChIP qPCR**

| <b>Locus</b>         | <b>Primers</b> | <b>Sequence (5'-3')</b>         |
|----------------------|----------------|---------------------------------|
| <b>CCL2 TSS</b>      | forward        | TCC CTC CTC CTG CTT GAC TC      |
|                      | reverse        | AGT CTC AGC CTC TCG GTT CC      |
| <b>CCL2 -200 bp</b>  | forward        | GCT TCA GAG AAA GCA GAA TC      |
|                      | reverse        | TTC ACT GCT GAG ACC AAA TG      |
| <b>CCL2 -600 bp</b>  | forward        | AGC AGG CTA TTT AAC CCT TC      |
|                      | reverse        | GGC ATA GAC AGC ATG TAG TG      |
| <b>CCL2 -1000 bp</b> | forward        | ATA TTC CTG GCA GAG TAA GC      |
|                      | reverse        | TCA TAG AAG CCT AGC AGA AC      |
| <b>GAPDH</b>         | forward        | TGG TGT CAG GTT ATG CTG GGC CAG |
|                      | reverse        | GTG GGA TGG GAG GGT GCT GAA CAC |

**Table 4 Primary antibodies used in this study**

| <b>Protein</b>         | <b>Order No.</b> | <b>species</b> | <b>company</b> |
|------------------------|------------------|----------------|----------------|
| <b>MCP-1</b>           | # sc-52877       | rabbit         | Santa Cruz     |
| <b>β-Tubulin</b>       | # sc-9104        | rabbit         | Santa Cruz     |
| <b>Topoisomerase I</b> | # sc-5342        | goat           | Santa Cruz     |

| <b>Protein</b>       | <b>Order No.</b>    | <b>species</b> | <b>company</b>         |
|----------------------|---------------------|----------------|------------------------|
| <b>HDAC4</b>         | # A303-467          | rabbit         | Bethyl<br>Laboratories |
| <b>NCoR1</b>         | #LS-C108878-<br>100 | mouse          | LsBio (für PLA)        |
| <b>NCoR1</b>         | # A301-145          | rabbit         | Bethyl<br>Laboratories |
| <b>p65 NFkB</b>      | # sc-109            | rabbit         | Santa Cruz             |
| <b>H3K4me1</b>       | # C15410037         | rabbit         | Diagenode              |
| <b>H3K4me3</b>       | # pAb-003-050       | rabbit         | Diagenode              |
| <b>H3K27ac</b>       | # pAB-174-050       | rabbit         | Diagenode              |
| <b>H3K27me3</b>      | # pAB-069-050       | rabbit         | Diagenode              |
| <b>H3-pan</b>        | # C15200011         | mouse          | Diagenode              |
| <b>Polymerase II</b> | # C15100055         | mouse          | Diagenode              |
| <b>β-Actin</b>       | # A1978             | mouse          | Sigma                  |
| <b>p-JNK</b>         | # 4688              | rabbit         | Cell Signaling         |
| <b>JNK</b>           | # sc-1648           | mouse          | Santa Cruz             |
| <b>p38</b>           | # ab31828           | mouse          | Abcam                  |
| <b>p-p38</b>         | # 9211              | rabbit         | Cell Signaling         |
| <b>ERK1/2</b>        | # 4696              | mouse          | Cell Signaling         |
| <b>p-ERK1/2</b>      | # 9101              | rabbit         | Cell Signaling         |
| <b>IgG</b>           | # C15410206         | rabbit         | Diagenode              |
